# Supplementary material
Source: Springer Nature journal article supplement (https://www.springermedizin.de/resource/supplementary/12990_2008_218_MOESM4_ESM.pdf/9612812)

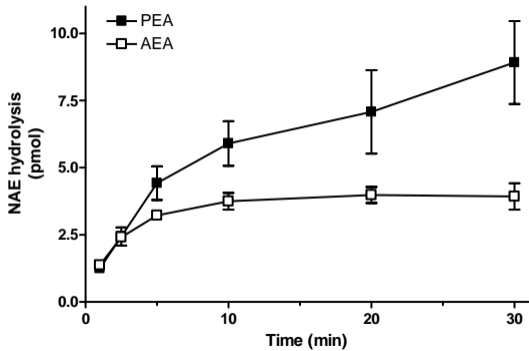

Supplement: MOESM4 [file 9612812]
